# Supplementary material for: Collective dynamics of confined rigid spheres and deformable drops
Source: Royal Society of Chemistry journal article supplement (doi:10.1039/c2sm25812a), 2012-01-01
Supplement: c2sm25812a.pdf [file c2sm25812a.pdf]

## Movie captions

**Video 1:** Deformable drop driven by Poiseuille flow in a parallel-wall channel migrates towards the channel center. Capillary number  $Ca = 0.5$  and channel width  $W/d = 1.67$ .

**Video 2:** Relative motion for a pair of rigid spheres (top) and deformable drops (bottom) in Poiseuille flow in a parallel-wall channel. Deformable drops tend to a stationary separation but rigid spheres maintain their initial separation. Capillary number  $Ca = 0.2$  and channel width  $W/d = 1.2$ .

**Video 3:** Pairing instability for an array of rigid spheres in Poiseuille flow in a parallel wall channel. Channel width  $W/d = 1.2$ , and initial interparticle separation  $\Delta X = 4a$ .

**Video 4:** Pairing instability for an array of deformable drops in Poiseuille flow in a parallel wall channel. Capillary number  $Ca = 0.2$ , channel width  $W/d = 1.2$ , and initial interparticle separation  $\Delta X = 4a$ .

**Video 5:** Pairing instability and pair-switching cascade for an array of deformable drops in Poiseuille flow in a parallel wall channel. Capillary number  $Ca = 0.2$ , channel width  $W/d = 1.2$ , and initial interparticle separation  $\Delta X = 3a$ .

**Video 6:** Linear array of rigid spheres is unstable to lateral displacements. Initially array is aligned with the external flow except that the trailing particle has a half radius transverse displacement. Channel width  $W/d = 1.2$ , interparticle separation  $\Delta X = 3a$ .

**Video 7:** Deformation stabilizes a linear array of drops with respect to lateral displacements. Initially array is aligned with the external flow except that the trailing particle has a half radius transverse displacement. Capillary number  $Ca = 0.2$ , channel width  $W/d = 1.2$ , and initial interparticle separation  $\Delta X = 3a$ .
